# Supplementary material for: Ultrasound-activable piezoelectric membranes for accelerating wound healing
Source: Royal Society of Chemistry journal article supplement (doi:10.1039/d1bm01062j), 2021-12-17
Supplement: d1bm01062j1.pdf [file d1bm01062j1.pdf]

## Supporting Information

### Ultrasound-Activable Piezoelectric Membranes for Accelerating Wound Healing

Xingxing Shi,<sup>ab</sup> Yingxin Chen,<sup>ac</sup> Yi Zhao,<sup>ad</sup> Mingzhou Ye,<sup>ad</sup> Shuidong Zhang,<sup>b</sup>

Shaoqin Gong<sup>\*adef</sup>

<sup>a</sup>Wisconsin Institute for Discovery, University of Wisconsin–Madison, Madison,  
Wisconsin 53706, United States

<sup>b</sup>School of Mechanical and Automotive Engineering, South China University of  
Technology, Guangzhou, Guangdong 510640, China

<sup>c</sup>Key Laboratory of Novel Materials for Sensor of Zhejiang Province, College of  
Materials and Environmental Engineering, Hangzhou Dianzi University, Hangzhou,  
Zhejiang 310018, China

<sup>d</sup>Department of Biomedical Engineering, University of Wisconsin–Madison, Madison,  
Wisconsin 53706, United States

<sup>e</sup>Department of Chemistry, University of Wisconsin–Madison, Madison, Wisconsin  
53706, United States

<sup>f</sup>Department of Materials Science and Engineering, University of Wisconsin–Madison,  
Madison, Wisconsin 53706, United States

\*Corresponding author.

E-mail addresses: shaoqingong@wisc.edu (S. Gong).

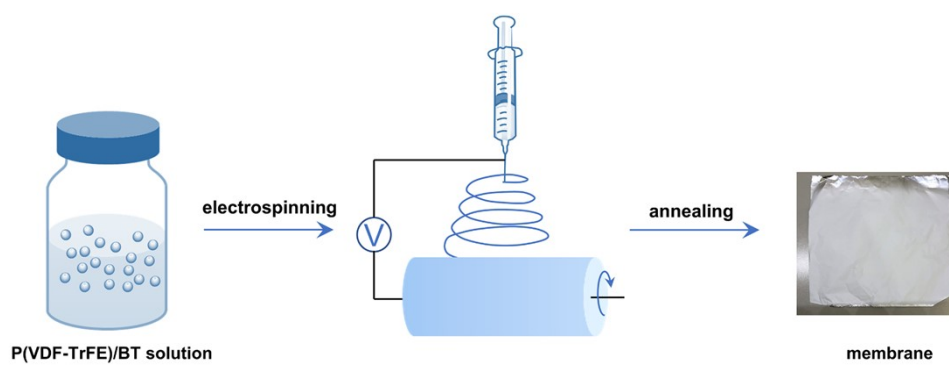

**Fig. S1** Schematic illustration of the fabrication of P(VDF-TrFE)/BT membranes.

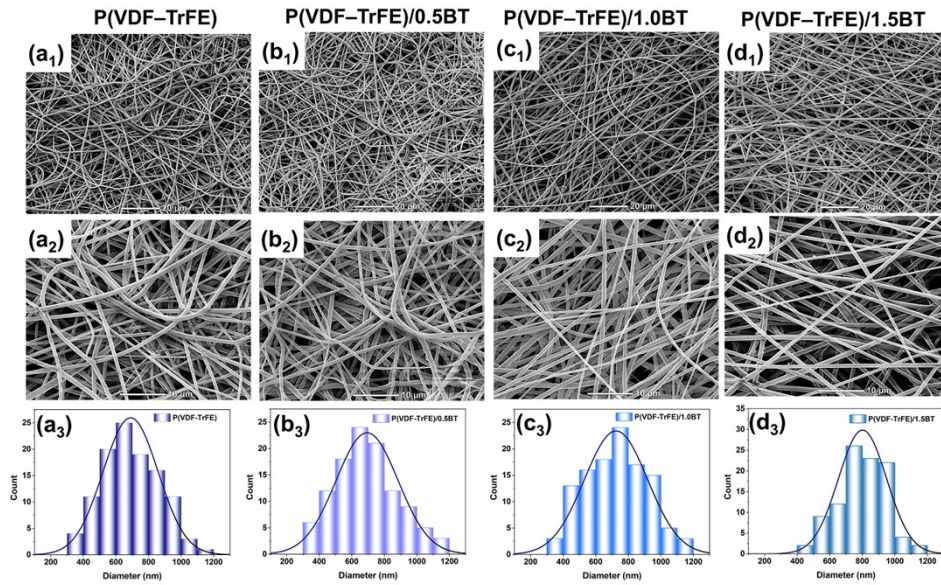

**Fig. S2** SEM images showing the nanofibrous microstructure and diameter distributions of (a<sub>1</sub>, a<sub>2</sub>, a<sub>3</sub>) P(VDF-TrFE), (b<sub>1</sub>, b<sub>2</sub>, b<sub>3</sub>) P(VDF-TrFE)/0.5BT, (c<sub>1</sub>, c<sub>2</sub>, c<sub>3</sub>) P(VDF-TrFE)/1.0BT, and (d<sub>1</sub>, d<sub>2</sub>, d<sub>3</sub>) P(VDF-TrFE)/1.5BT membranes.

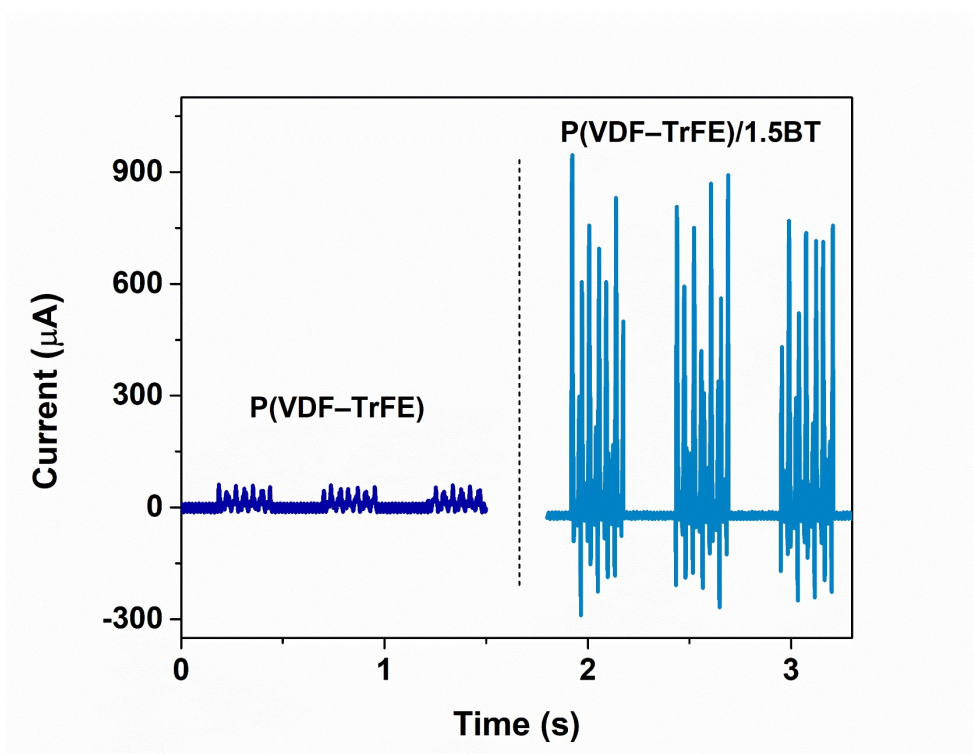

**Fig. S3** The output currents generated from the P(VDF-TrFE) and P(VDF-TrFE)/1.5BT membranes under ultrasonic stimulation.

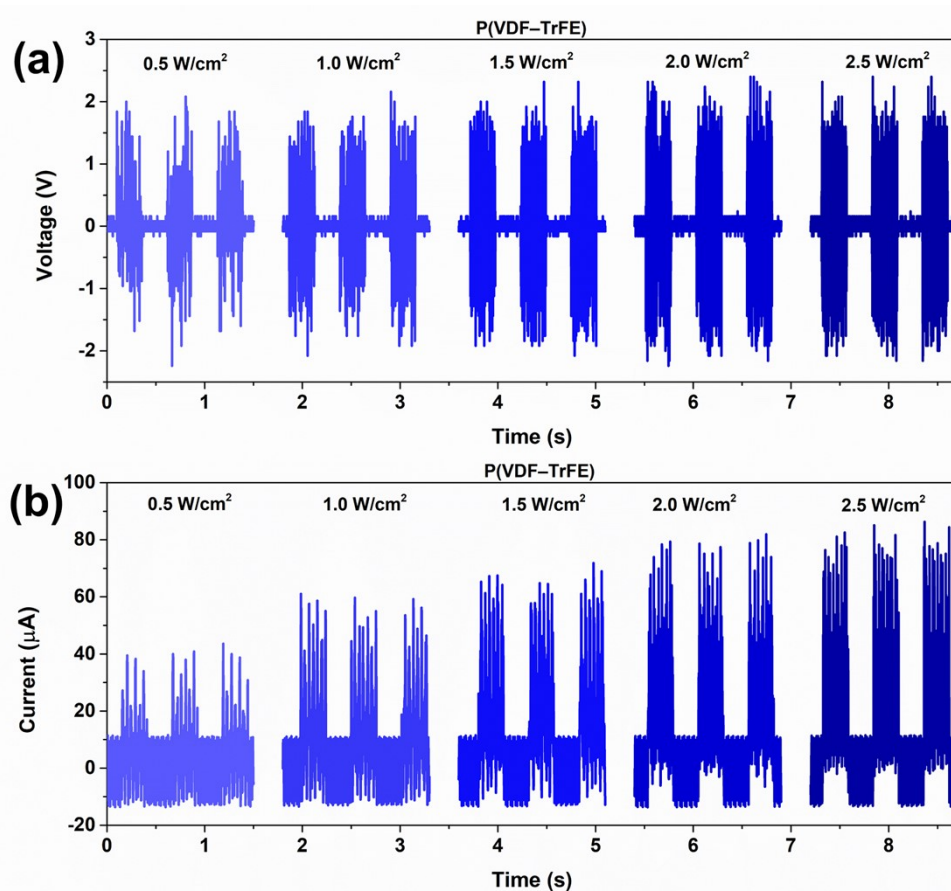

**Fig. S4** The output (a) voltages and (b) currents of the P(VDF-TrFE) membranes under ultrasonic stimulation with different power intensities (i.e., 0.5 W/cm<sup>2</sup>, 1.0 W/cm<sup>2</sup>, 1.5 W/cm<sup>2</sup>, 2.0 W/cm<sup>2</sup>, and 2.5 W/cm<sup>2</sup>).

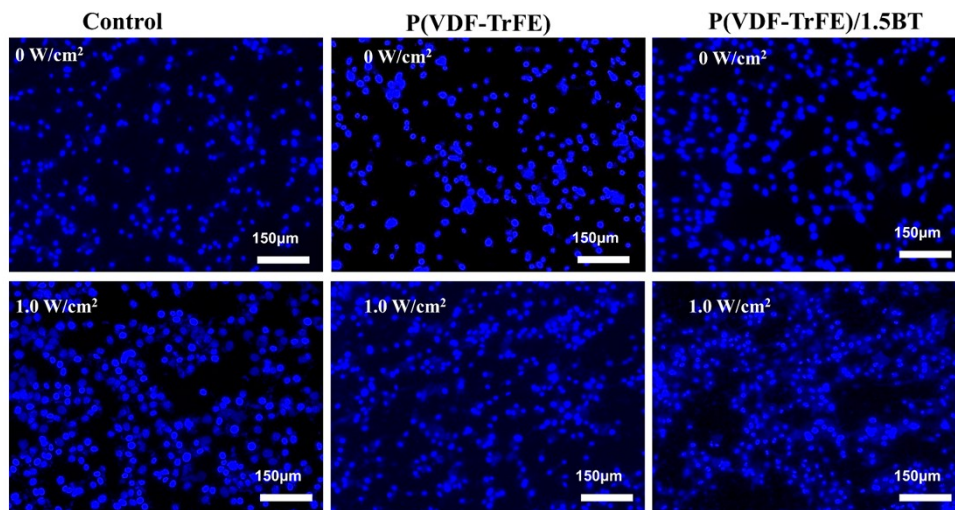

**Fig. S5** The fluorescence images of DAPI-stained NIH-3T3 fibroblasts with/without ultrasound treatment for three days (scale bar = 150 μm).

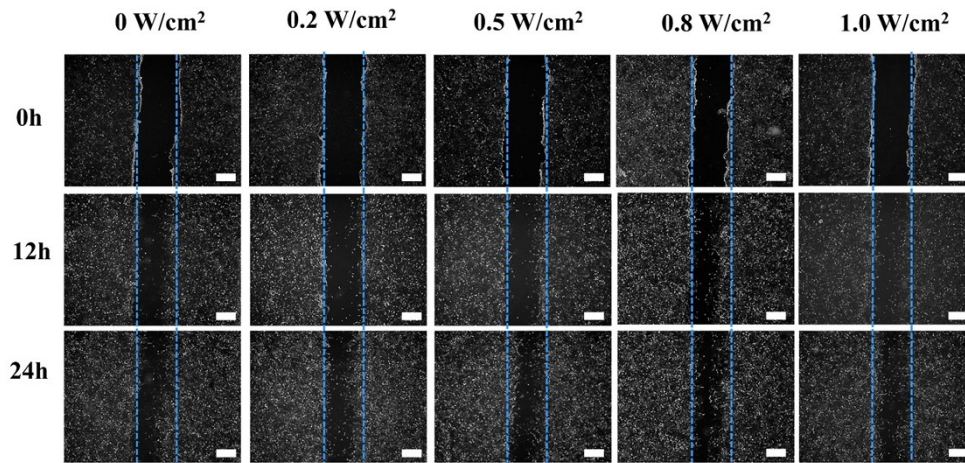

**Fig. S6** The cell migration images of NIH-3T3 fibroblasts on the culture plates (control group) stimulated by ultrasound with different power intensities (scale bar = 500  $\mu$ m).

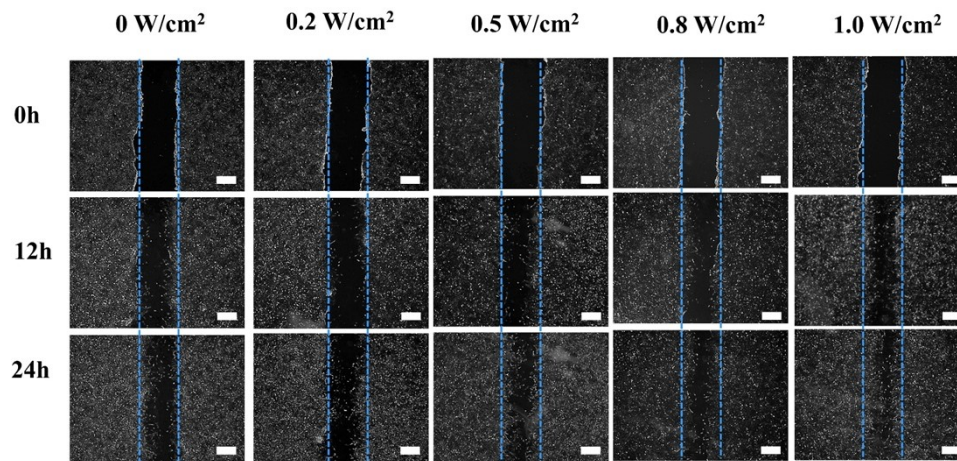

**Fig. S7** The cell migration images of NIH-3T3 fibroblasts on the P(VDF–TrFE) membranes stimulated by ultrasound with different power intensities (scale bar = 500  $\mu\text{m}$ ).



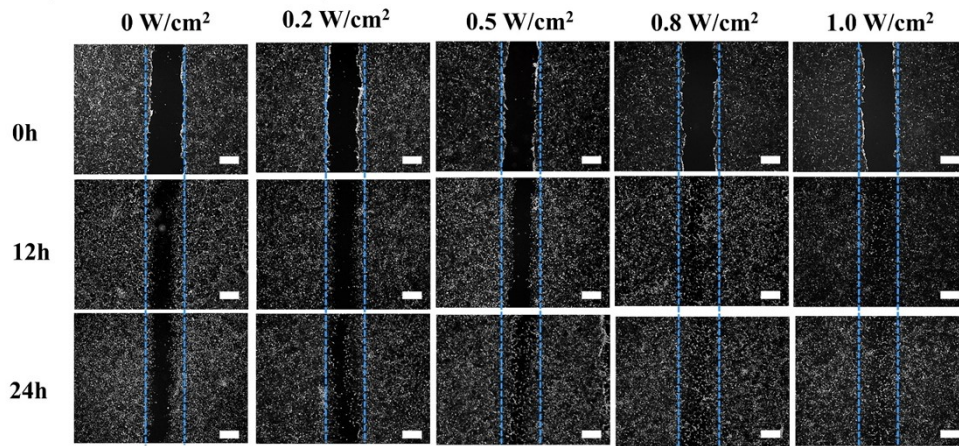

**Fig. S8** The cell migration images of NIH-3T3 fibroblasts on the P(VDF–TrFE)/1.5BT membranes stimulated by ultrasound with different power intensities (scale bar = 500  $\mu\text{m}$ ).

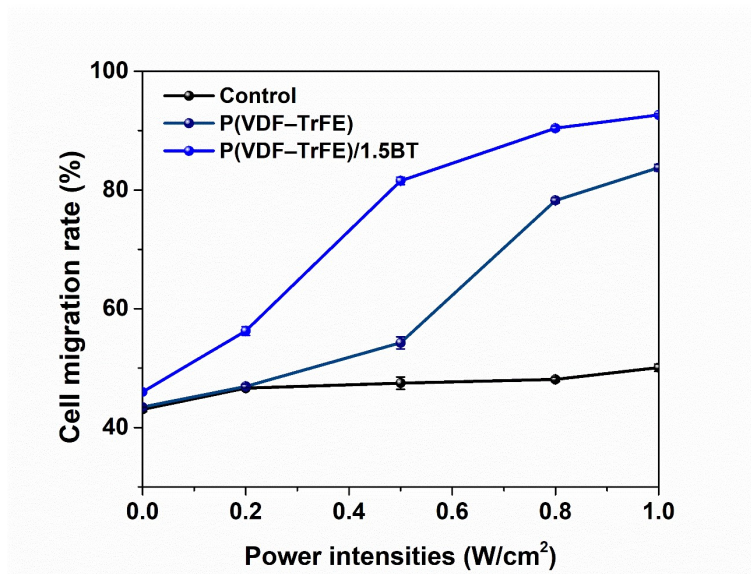

**Fig. S9** The quantitative analysis of the cell migration rate of NIH-3T3 fibroblasts on the culture plates (control group) and P(VDF-TrFE)/BT membranes from the scratch tests

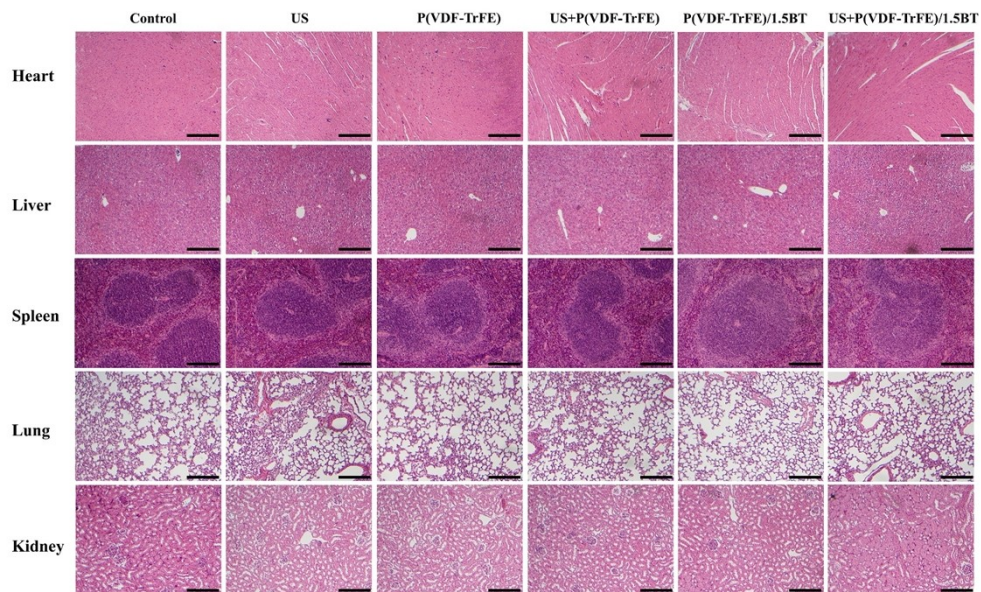

**Fig. S10.** H&E staining of the main tissues of the mice in different groups at the end of the experiments (scale bar = 200 μm).

**Video lists**

**Video S1.** The output voltages generated from the ultrasound-activable P(VDF–TrFE)/1.5BT membrane on the mouse skin.

**Video S2.** The output voltages of P(VDF–TrFE) membrane implanted at 1.5 cm.

**Video S3.** The output voltages of P(VDF–TrFE)/1.5BT membrane implanted at 1.5 cm.

**Video S4.** A flashed LED charged by the P(VDF-TrFE)/1.5BT membrane implanted at 1.5 cm under 1.4 ms pulse duration.
